# Supplementary material
Source: PubMed Central journal article supplement (PMC3562306)
Supplement: cc-11-4613-s01.pdf [file cc-11-4613-s01.pdf]

## **Supplemental Material to:**

**Nayden G. Naydenov, Gianni Harris, Victor Morales  
and Andrei I. Ivanov**

**Loss of a membrane trafficking protein  $\alpha$ SNAP induces  
non-canonical autophagy in human epithelia**

**Cell Cycle 2012; 11(24)**

**<http://dx.doi.org/10.4161/cc.22885>**

**<http://www.landesbioscience.com/journals/cc/article/22885>**

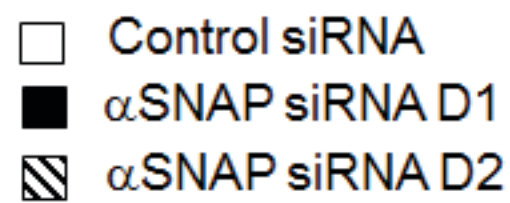

Relative expression

1.8  
1.6  
1.4  
1.2  
1  
0.8  
0.6  
0.4  
0.2  
0

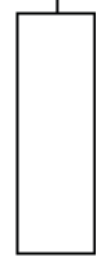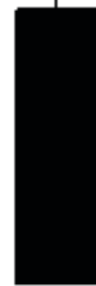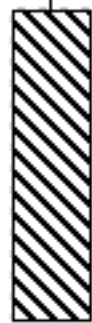

LC3 mRNA

Relative expression

1.8  
1.6  
1.4  
1.2  
1  
0.8  
0.6  
0.4  
0.2  
0

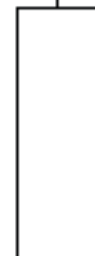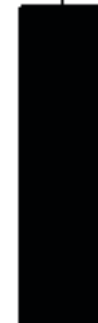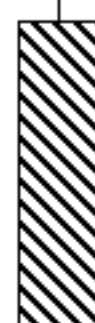

NBR1 mRNA

Relative expression

2  
1.8  
1.6  
1.4  
1.2  
1  
0.8  
0.6  
0.4  
0.2  
0

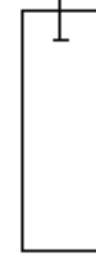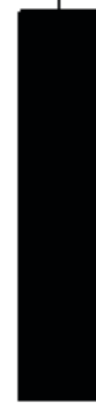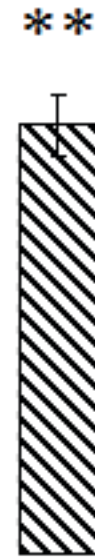

p62 mRNA

A

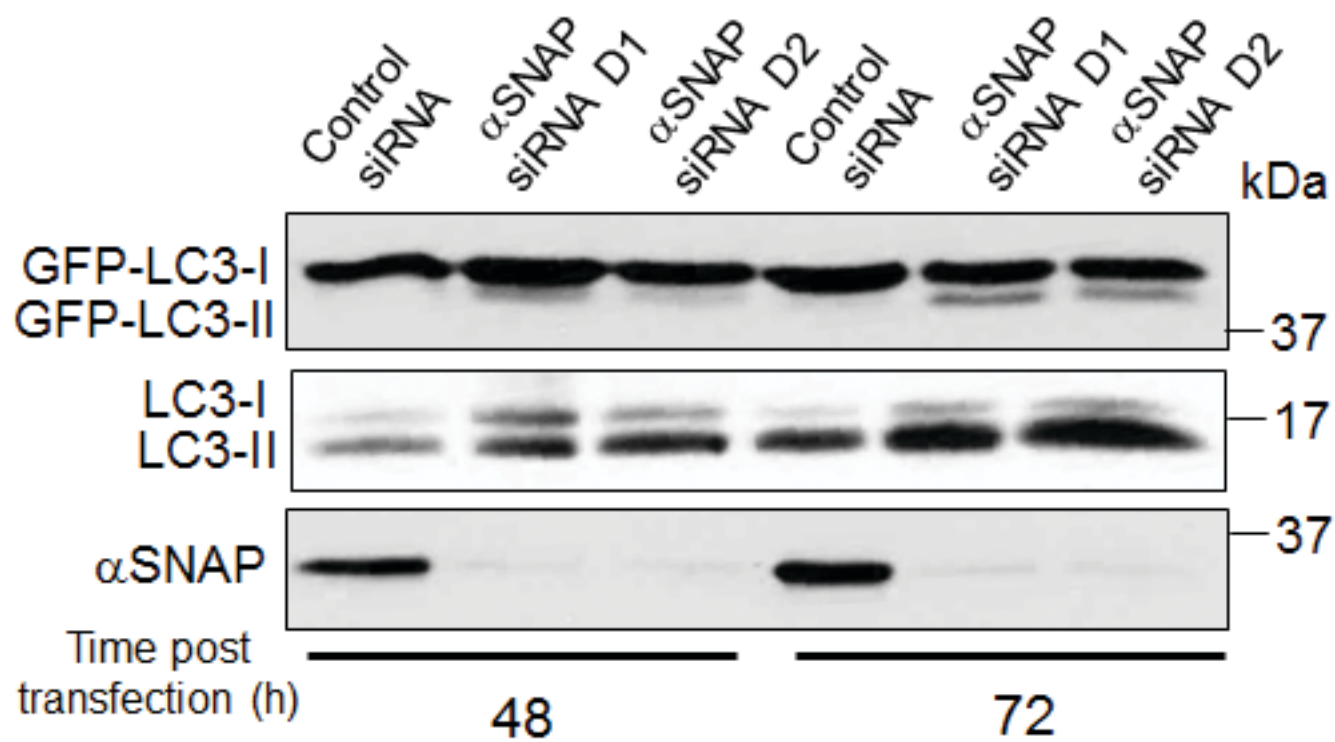

B

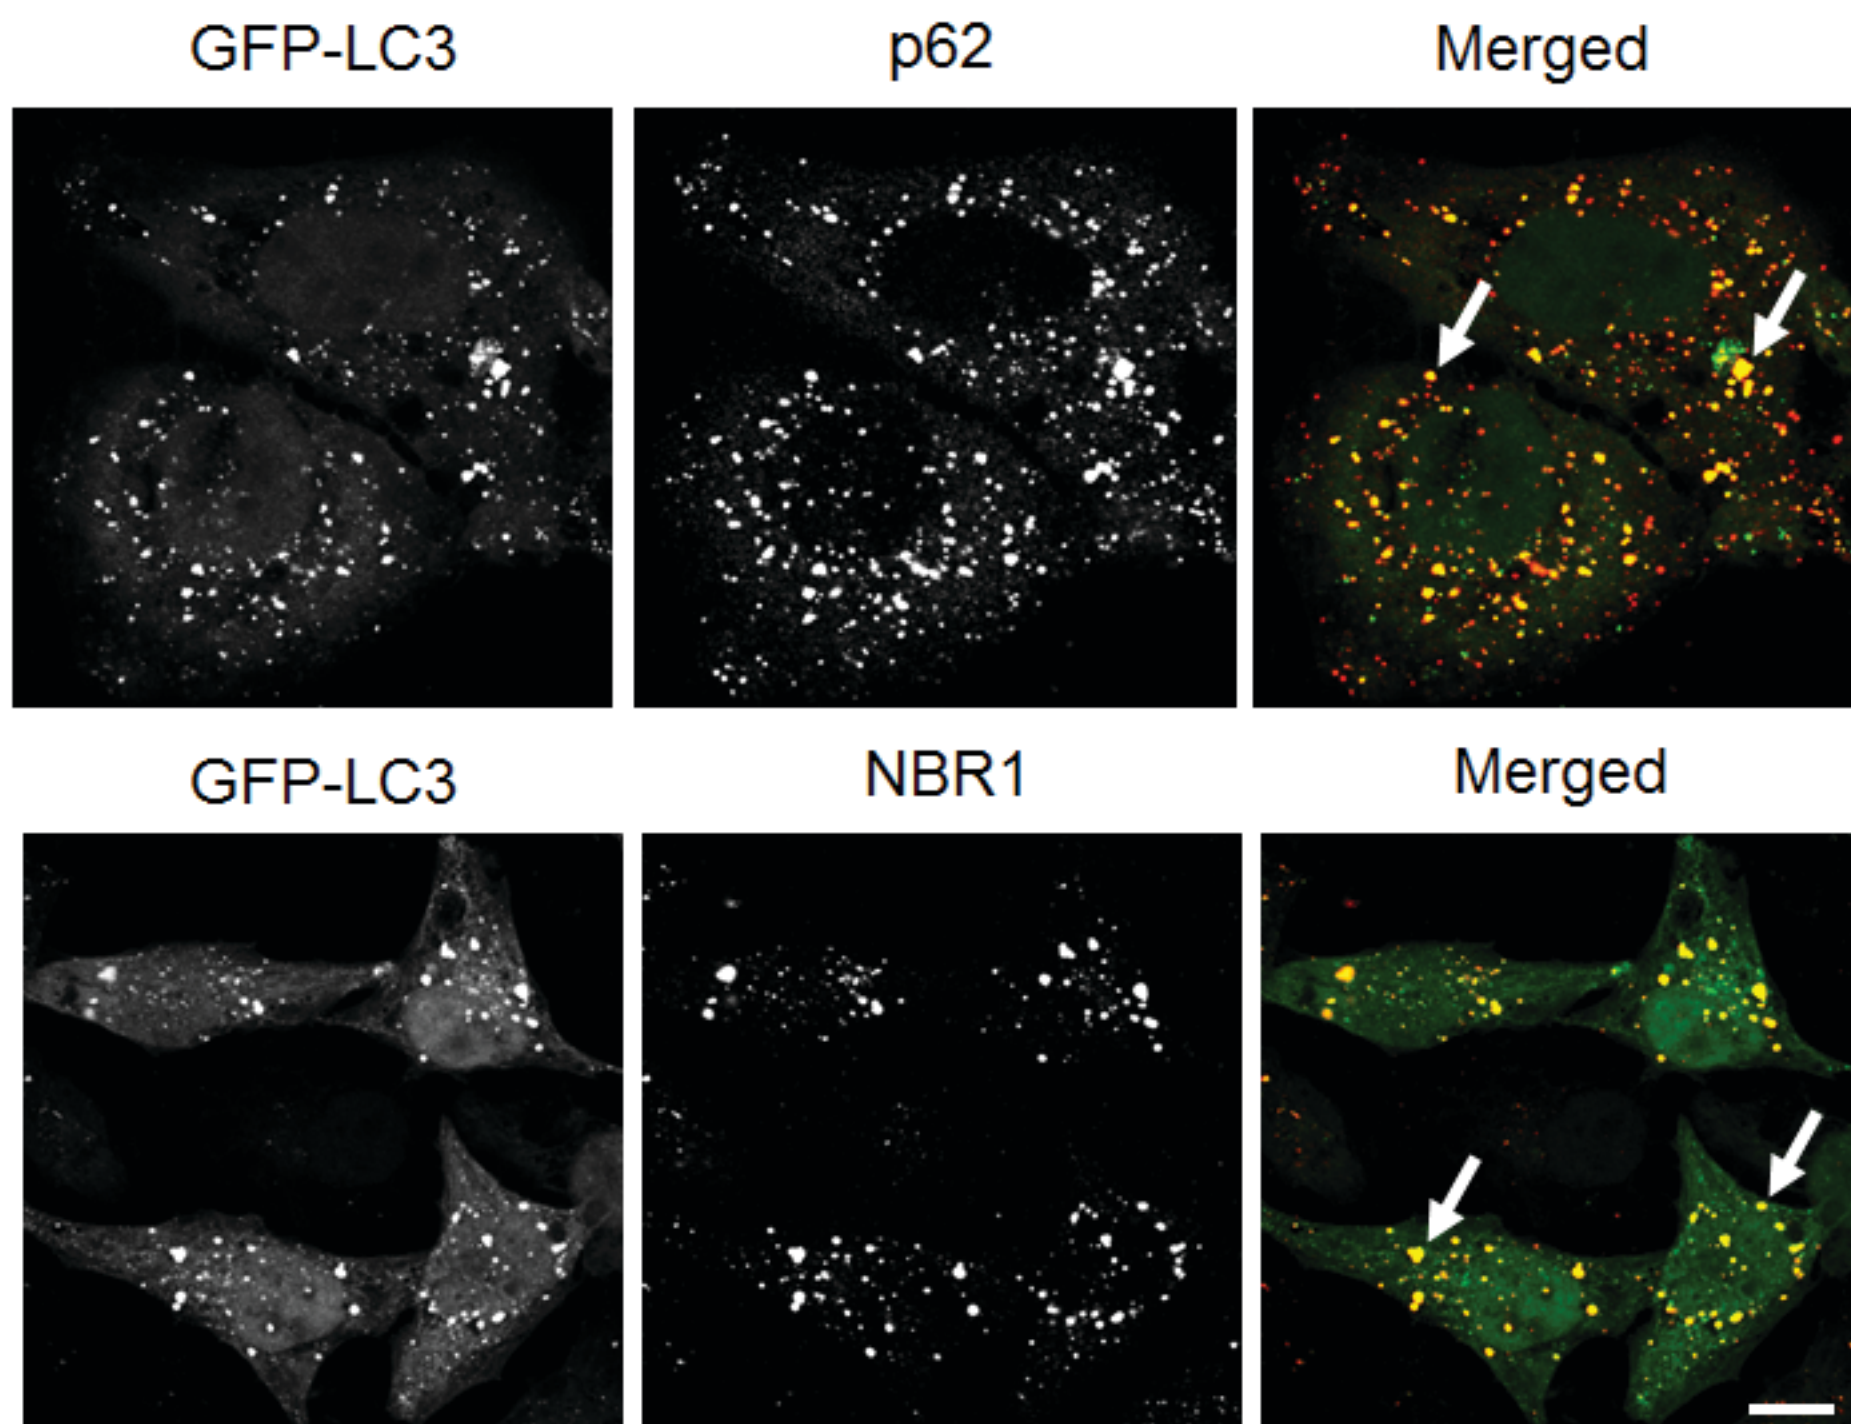

**A**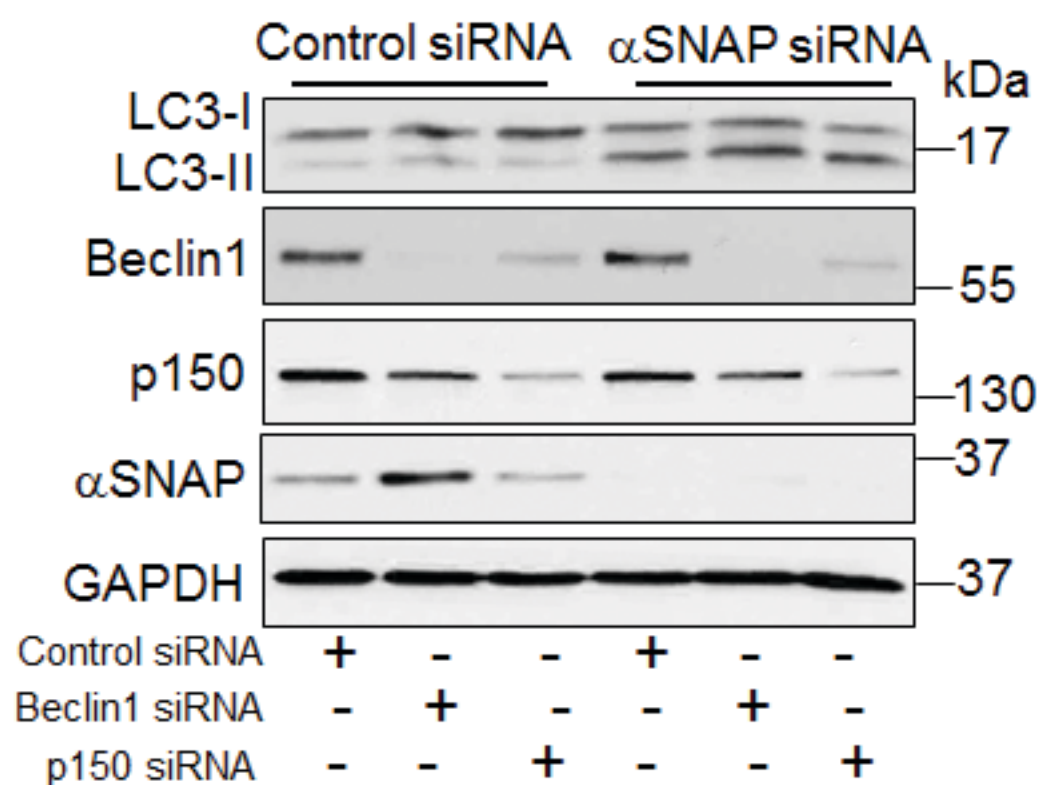**B**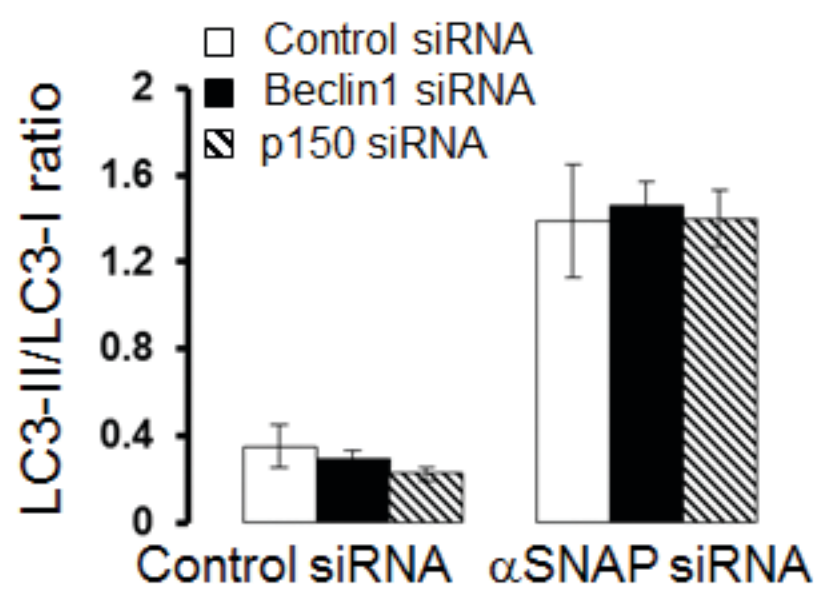**C**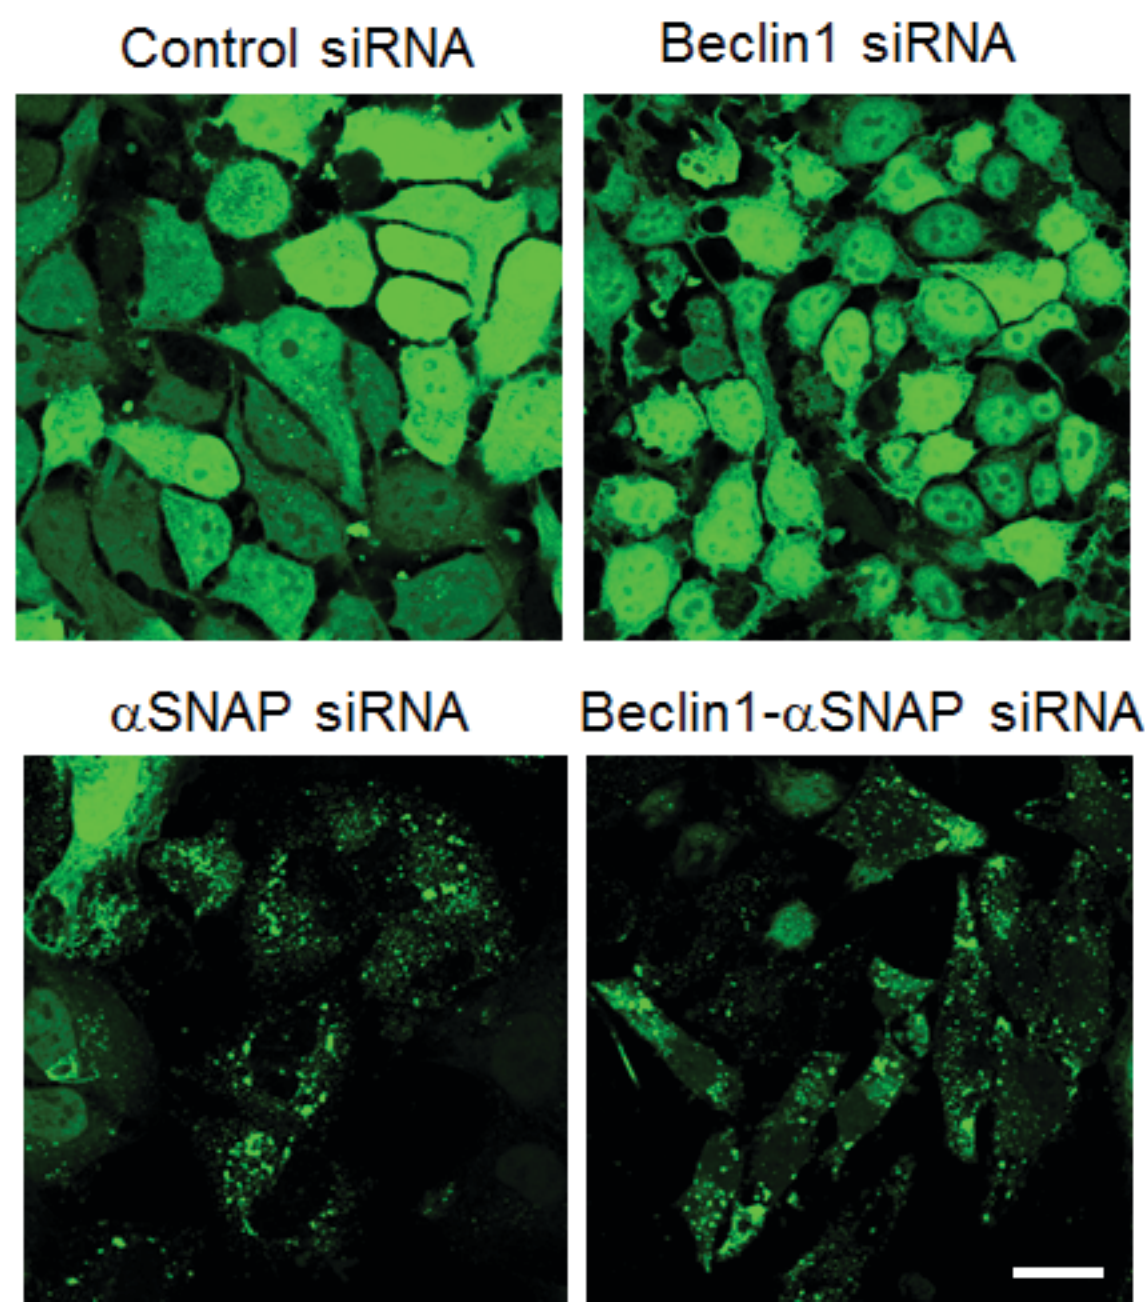**D**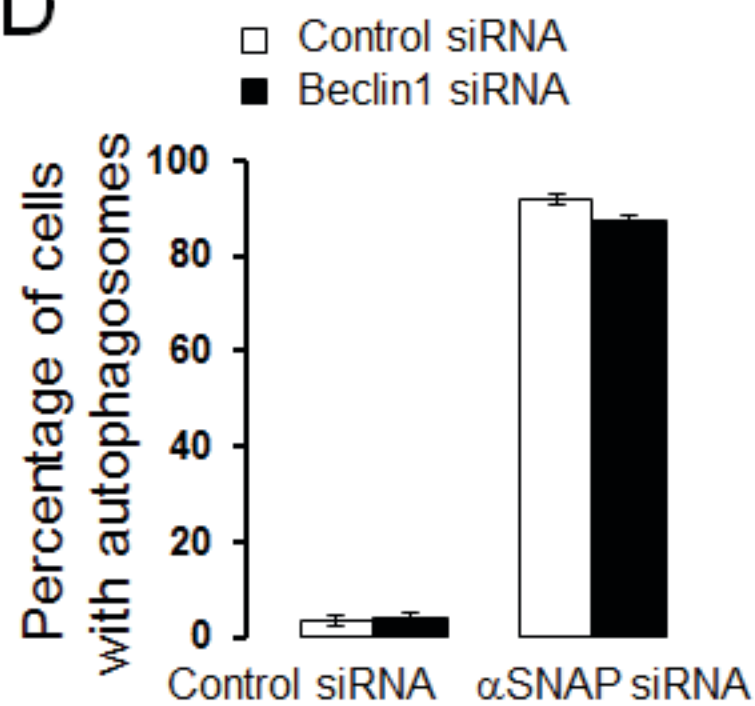

**A**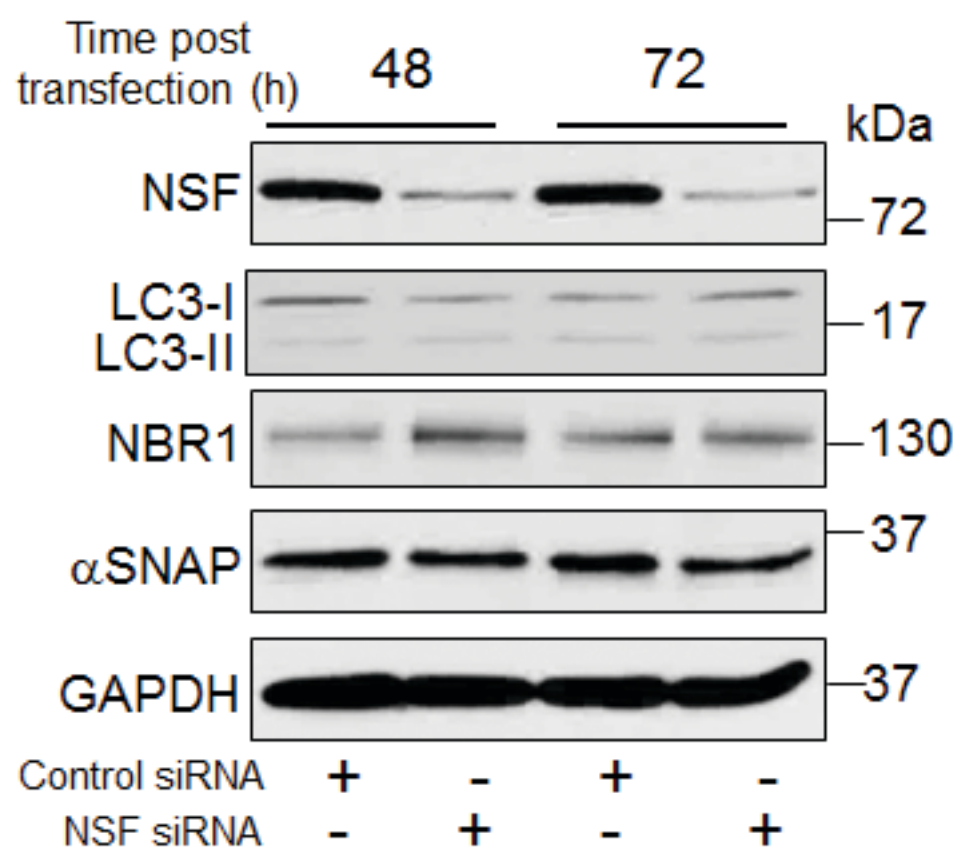**B**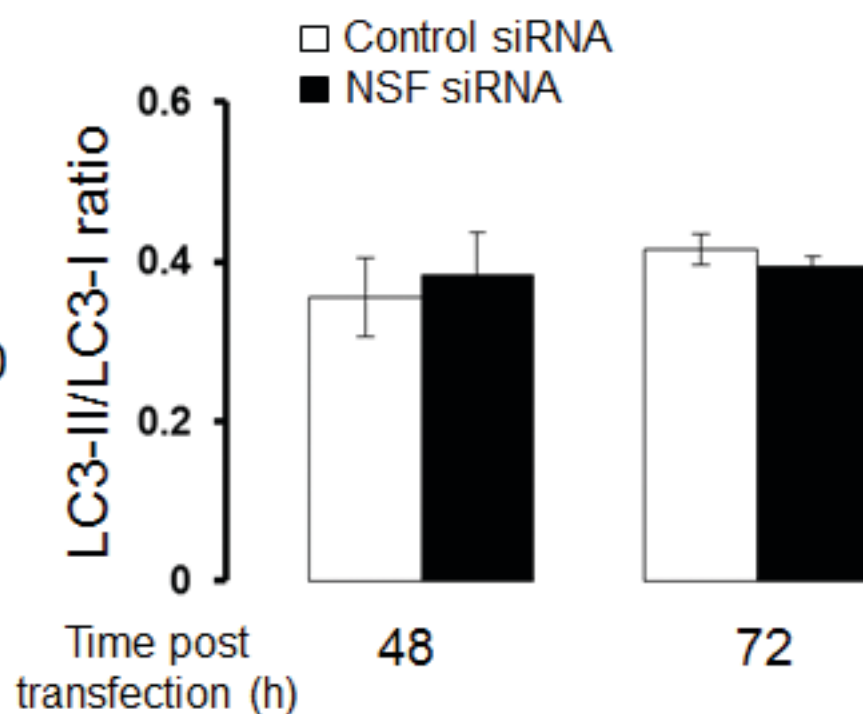**C**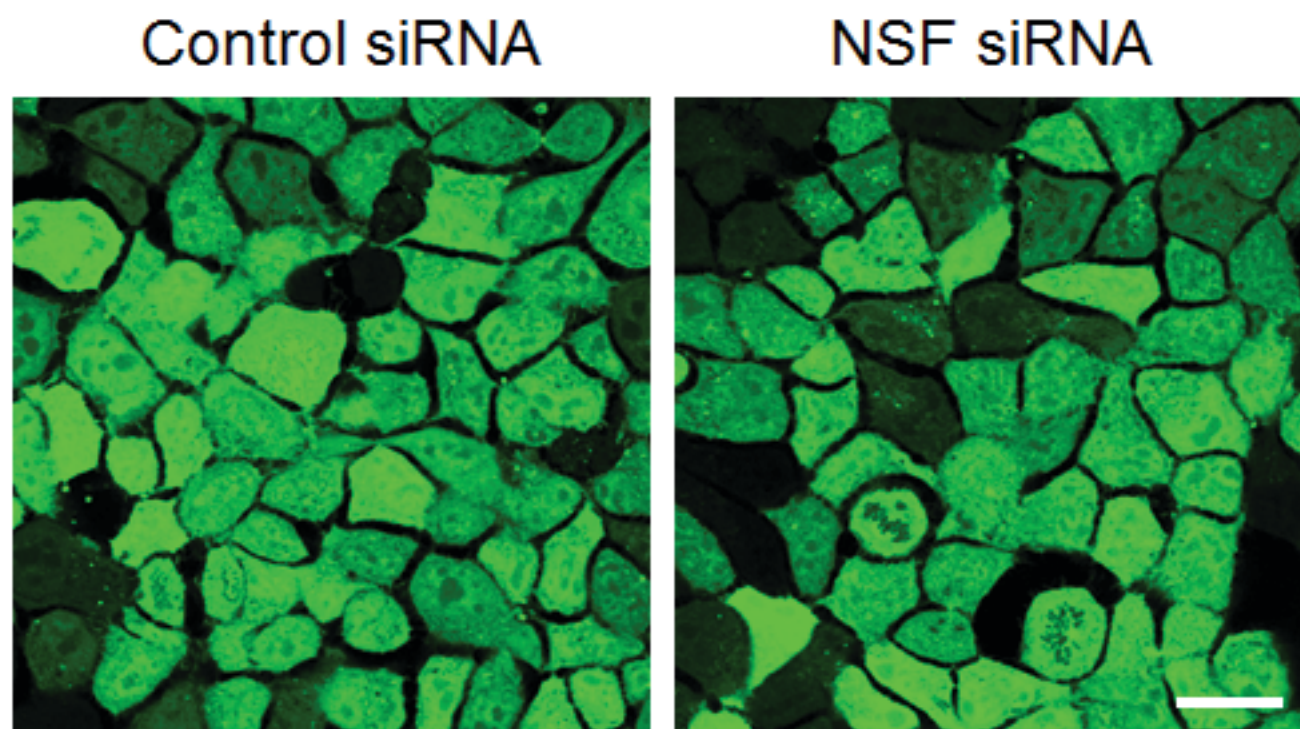**D**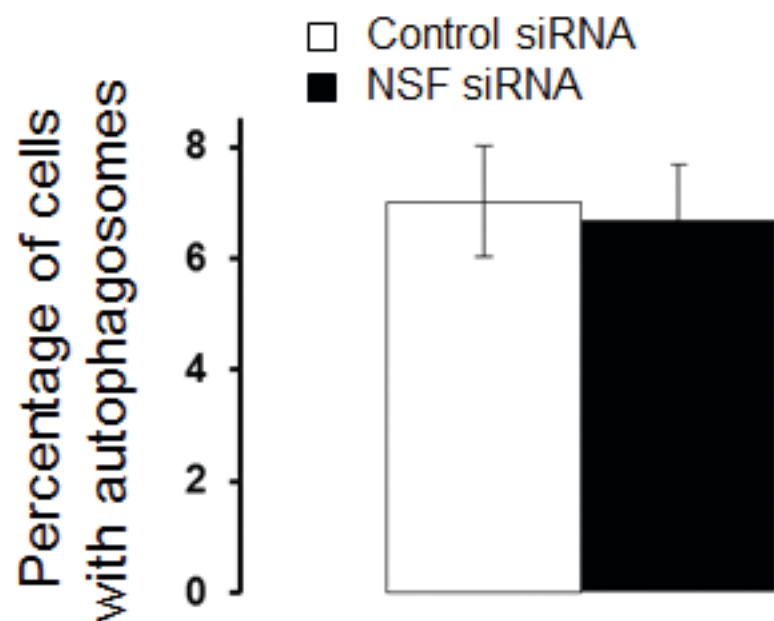

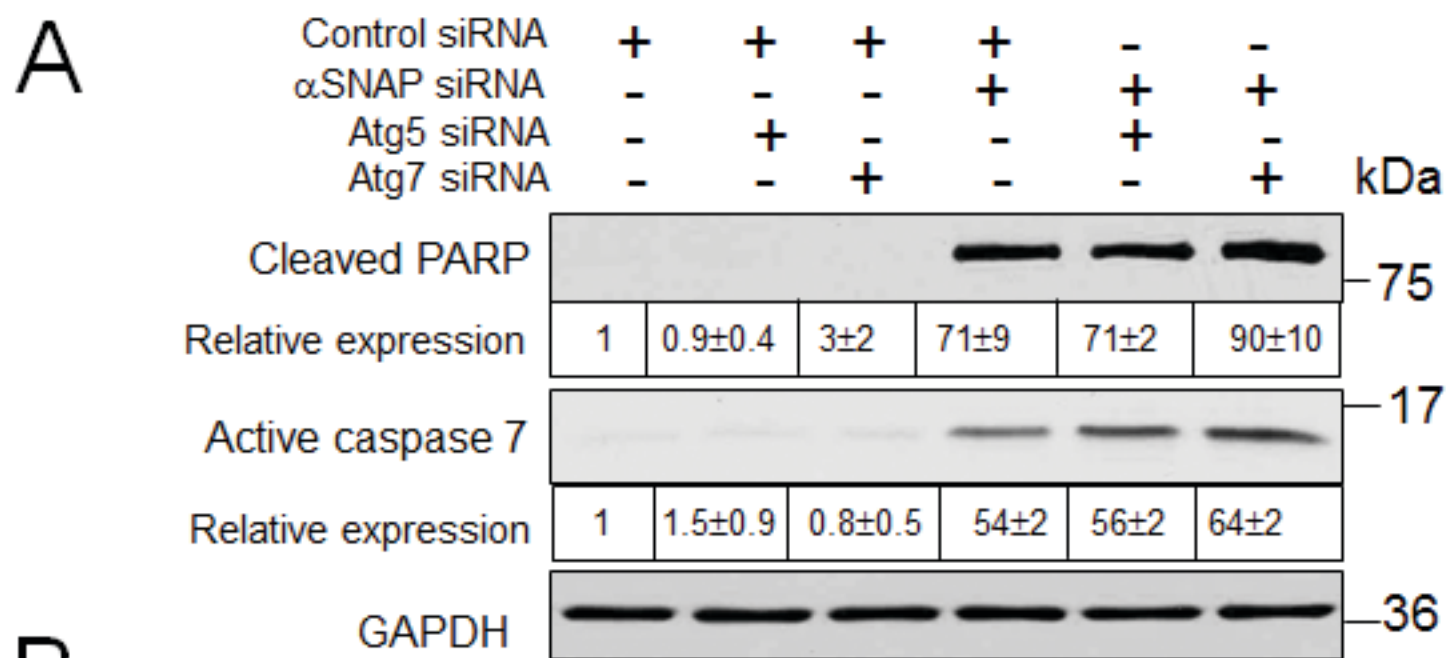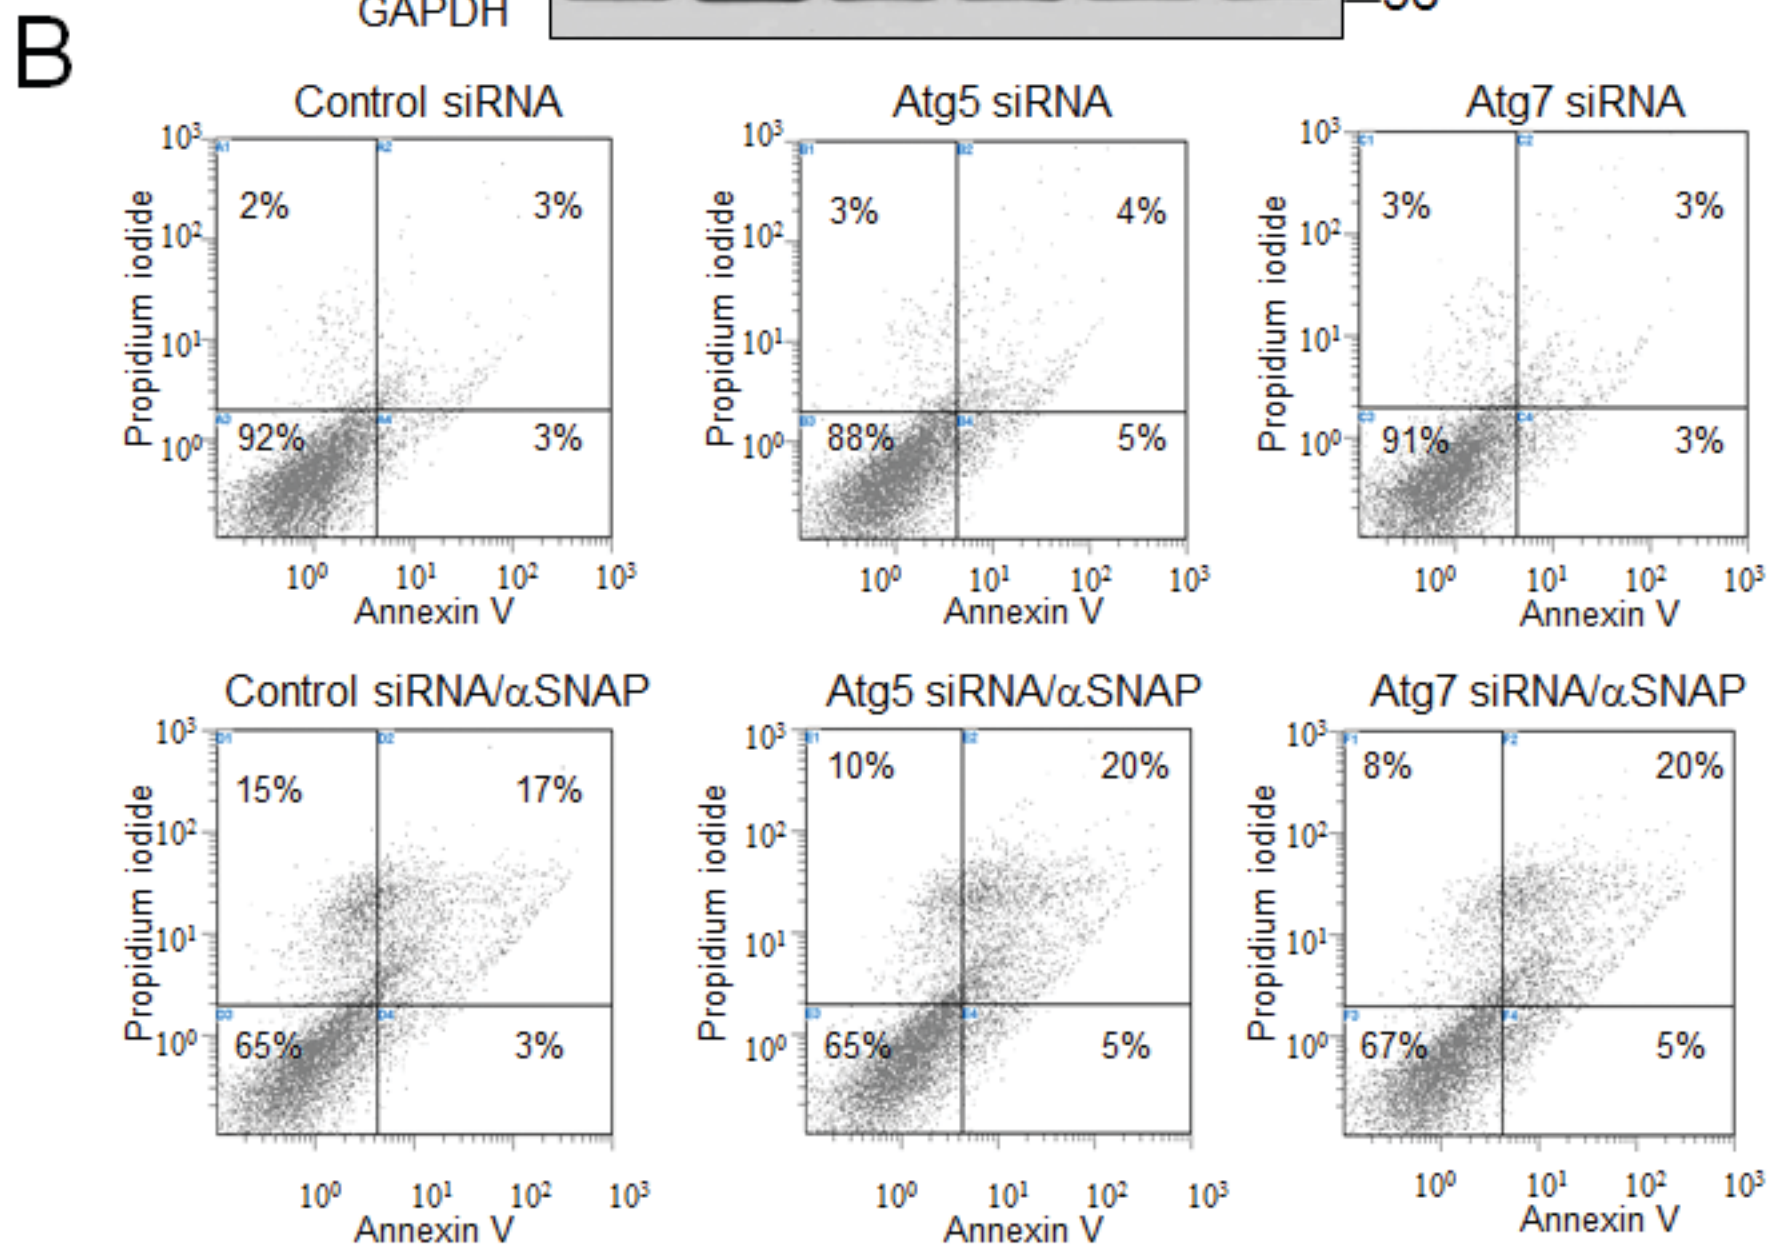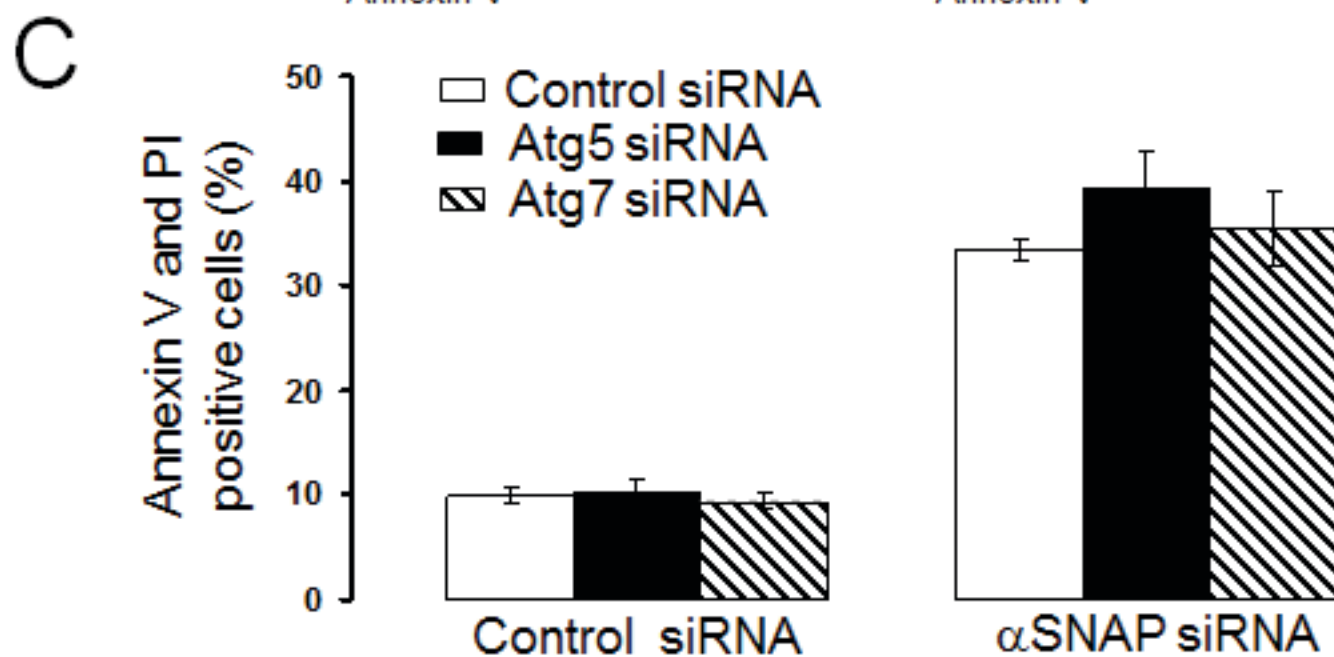

**Figure S1.** Loss of  $\alpha$ SNAP selectively increases mRNA transcription of LC3. SK-CO15 cells were transfected with either control or two different  $\alpha$ SNAP-specific siRNAs. mRNA levels of LC3, NBR1 and p62 were examined by a quantitative real-time RT-PCR at 72 h post-transfection. \*\*  $p < 0.05$  compared to control  $\alpha$ SNAP siRNA-transfected cells

**Figure S2.** Loss of  $\alpha$ SNAP increases LC3 conjugation and triggers formation of p62 and NBR1-positive autophagosomes in HeLa-GFP-LC3 cells. (A) Representative immunoblots show induction of autophagic markers in HeLa-GFP-LC3 cells at different times after  $\alpha$ SNAP depletion. (B) Confocal microscopy images demonstrate accumulation of NBR1 and p62-positive in autophagosomes (arrows) in these cells following  $\alpha$ SNAP knockdown. Scale bar, 10  $\mu$ m.

**Figure S3.** Enhanced autophagy in  $\alpha$ SNAP-depleted epithelial cells is not mediated by beclin-1. (A, B) SK-CO15 cells were subjected to sequential transfections with one of the following siRNA pairs: control-control, control-beclin-1, control-p150, control- $\alpha$ SNAP, beclin-1- $\alpha$ SNAP and p150- $\alpha$ SNAP. Expression of LC3,  $\alpha$ SNAP, beclin-1 and p150 was determined by immunoblotting 48 h after the second transfection. (C, D) HeLa-GFP-LC3 cells were sequentially transfected with control-control, control-beclin-1, control- $\alpha$ SNAP and beclin-1- $\alpha$ SNAP siRNA combinations and formation of autophagosomes was analyzed by fluorescence spectroscopy 72 h after the second transfection. Scale bar, 20  $\mu$ m.

**Figure S4.** Downregulation of N-ethylmaleimide sensitive factor (NSF) does not stimulate epithelial cell autophagy. (A, B) SK-CO15 cells were transfected with either control or NSF-specific siRNAs and expression of NSF,  $\alpha$ SNAP and autophagic markers were analyzed by immunoblotting at different times post-transfection. (C, D) HeLa-GFP-LC3 cells were transfected with either control or NSF-specific siRNAs and formation of autophagosomes was analyzed by fluorescence microscopy at 72 h post-transfection. Scale bar, 20  $\mu$ m.

**Figure S5.** Induction of autophagy does not affect apoptosis in  $\alpha$ SNAP-deficient epithelial cells. SK-CO15 cells were subjected to sequential transfections with combinations of control, Atg5, Atg7 and  $\alpha$ SNAP siRNAs as described in the Figure 4 legend. Induction of apoptotic markers was determined by immunoblotting (A) and flow cytometry (B, C).
